# Supplementary material
Source: PubMed Central journal article supplement (PMC4203517)
Supplement: auto-10-1403-s01.pdf [file auto-10-1403-s01.pdf]

## **Supplemental Material to:**

**Devalingam Mahalingam, Monica Mita,  
John Sarantopoulos, Leslie Wood, Ravi Amaravadi,  
Lisa Davis, Alain Mita, Tyler J Curiel, Claudia M Espitia,  
Steffan T Nawrocki, Francis J Giles, and Jennifer S Carew**

**Combined autophagy and HDAC inhibition:  
A phase I safety, tolerability, pharmacokinetic, and  
pharmacodynamic analysis of hydroxychloroquine  
in combination with the HDAC inhibitor vorinostat in  
patients with advanced solid tumors**

**Autophagy 2014; 10(8)**

**<http://dx.doi.org/10.4161/auto.29231>**

**[www.landesbioscience.com/journals/autophagy/article/29231](http://www.landesbioscience.com/journals/autophagy/article/29231)**

**Table S1.** Hydroxychloroquine (HCQ) and Vorinostat (VOR) dose-reduction schema

| <b>HCQ Dose Level</b> | <b>Dose mg/day</b> | <b>Reduce to</b> | <b>VOR starting dose = 400 mg/day</b> |        |
|-----------------------|--------------------|------------------|---------------------------------------|--------|
| 4                     | 1000               | 800              | Level -1                              | 300 mg |
| 3                     | 800                | 600              | Level -2                              | 200 mg |
| 2                     | 600                | 400              | Level -3                              | 100 mg |
| 1                     | 400                | 200              |                                       |        |
